# Supplementary material for: Long-term prognostic effect of hormone receptor subtype on breast cancer
Source: Springer Nature journal article supplement (doi:10.1007/s10549-019-05456-w), 2019-10-08
Supplement: MOESM1 [file 17250750]

# **Table S1.** Detailed breast cancer specific survival rates according to hormone receptor subtype

| Follow up time |  | ER(+)/PR(+) | | |  | ER(+)/PR(-) | | |  | ER(-)/PR(+) | | |  | ER(-)/PR(-) | | |  | ER/PR Unknown | | |  | Total | | |
| --- | --- | --- | --- | --- | --- | --- | --- | --- | --- | --- | --- | --- | --- | --- | --- | --- | --- | --- | --- | --- | --- | --- | --- | --- |
|  | Subject No | Event No* | Rate |  | Subject No | Event No* | Rate |  | Subject No | Event No* | Rate |  | Subject No | Event No* | Rate |  | Subject No | Event No* | Rate |  | Subject No | Event No* | Rate |
| 60 months |  | 496,279 | 17,834 | 95.3% |  | 86,858 | 6,563 | 90.6% |  | 11,545 | 1,442 | 85.7% |  | 135,441 | 20,653 | 82.0% |  | 80,464 | 7,298 | 90.2% |  | 810,587 | 53,790 | 91.8% |
| 120 months |  | 293,456 | 31,981 | 89.3% |  | 51,660 | 9,929 | 83.2% |  | 7,499 | 1,918 | 79.6% |  | 76,512 | 24,736 | 76.7% |  | 61,764 | 10,984 | 84.2% |  | 490,891 | 79,548 | 85.8% |
| 180 months |  | 146,270 | 37,678 | 84.3% |  | 25,938 | 10,974 | 78.4% |  | 4,988 | 2,105 | 75.9% |  | 41,181 | 25,677 | 74.2% |  | 43,296 | 12,636 | 80.1% |  | 261,673 | 89,070 | 81.4% |
| 240 months |  | 53,455 | 39,420 | 79.7% |  | 8,937 | 11,223 | 74.8% |  | 2,749 | 2,187 | 72.8% |  | 16,168 | 25,974 | 72.1% |  | 20,117 | 13,181 | 76.7% |  | 101,426 | 91,985 | 77.6% |
| 300 months |  | 15,724 | 39,796 | 76.1% |  | 2,808 | 11,265 | 72.8% |  | 1,224 | 2,208 | 70.5% |  | 5,704 | 26,048 | 70.3% |  | 7,315 | 13,322 | 74.1% |  | 32,775 | 92,639 | 74.8% |

Abbreviations: ER, estrogen receptor; PR, progesterone receptor.

*Cumulative number of events.

# **Table S2.** Detailed breast cancer specific survival rates according to hormone receptor, estrogen receptor, and progesterone receptor status

| Follow up time |  | Hormone receptor (-) | | |  | Hormone receptor (+) | | |  | Hormone receptor unknown | | |  | Total | | |
| --- | --- | --- | --- | --- | --- | --- | --- | --- | --- | --- | --- | --- | --- | --- | --- | --- |
|  | Subject No | Event No* | Rate |  | Subject No | Event No* | Rate |  | Subject No | Event No* | Rate |  | Subject No | Event No* | Rate |
| 60 months |  | 135,441 | 20,653 | 82.0% |  | 607,321 | 26,596 | 94.4% |  | 67,825 | 6,541 | 89.6% |  | 810,587 | 53,790 | 91.8% |
| 120 months |  | 76,512 | 24,736 | 76.7% |  | 363,027 | 45,185 | 88.2% |  | 51,352 | 9,627 | 83.6% |  | 490,891 | 79,548 | 85.8% |
| 180 months |  | 41,181 | 25,677 | 74.2% |  | 184,027 | 52,397 | 83.2% |  | 36,465 | 10,996 | 79.6% |  | 261,673 | 89,070 | 81.4% |
| 240 months |  | 16,168 | 25,974 | 72.1% |  | 68,211 | 54,561 | 78.9% |  | 17,047 | 11,450 | 76.3% |  | 101,426 | 91,985 | 77.6% |
| 300 months |  | 5,704 | 26,048 | 70.3% |  | 20,747 | 55,009 | 75.7% |  | 6,324 | 11,582 | 73.6% |  | 32,775 | 92,639 | 74.8% |
|  |  |  |  |  |  |  |  |  |  |  |  |  |  |  |  |  |
| Follow up time |  | ER(-) | | |  | ER(+) | | |  | ER unknown | | |  | Total | | |
|  | Subject No | Event No* | Rate |  | Subject No | Event No* | Rate |  | Subject No | Event No* | Rate |  | Subject No | Event No* | Rate |
| 60 months |  | 148,640 | 22,365 | 82.3% |  | 594,836 | 25,052 | 94.6% |  | 67,111 | 6,373 | 89.7% |  | 810,587 | 53,790 | 91.8% |
| 120 months |  | 85,234 | 26,995 | 77.0% |  | 354,762 | 43,113 | 88.4% |  | 50,895 | 9,440 | 83.7% |  | 490,891 | 79,548 | 85.8% |
| 180 months |  | 47,089 | 28,150 | 74.3% |  | 178,440 | 50,116 | 83.3% |  | 36,144 | 10,804 | 79.7% |  | 261,673 | 89,070 | 81.4% |
| 240 months |  | 19,472 | 28,550 | 72.0% |  | 65,087 | 52,183 | 79.0% |  | 16,867 | 11,252 | 76.4% |  | 101,426 | 91,985 | 77.6% |
| 300 months |  | 7,238 | 28,649 | 70.2% |  | 19,297 | 52,606 | 75.7% |  | 6,240 | 11,384 | 73.7% |  | 32,775 | 92,639 | 74.8% |
|  |  |  |  |  |  |  |  |  |  |  |  |  |  |  |  |  |
| Follow up time |  | PR(-) | | |  | PR(+) | | |  | PR unknown | | |  | Total | | |
|  | Subject No | Event No* | Rate |  | Subject No | Event No* | Rate |  | Subject No | Event No* | Rate |  | Subject No | Event No* | Rate |
| 60 months |  | 223,254 | 27,374 | 85.3% |  | 508,764 | 19,378 | 95.1% |  | 78,569 | 7,038 | 90.4% |  | 810,587 | 53,790 | 91.8% |
| 120 months |  | 128,849 | 34,862 | 79.2% |  | 301,721 | 34,053 | 89.0% |  | 60,321 | 10,633 | 84.3% |  | 490,891 | 79,548 | 85.8% |
| 180 months |  | 67,560 | 36,860 | 75.9% |  | 151,857 | 39,959 | 84.1% |  | 42,256 | 12,251 | 80.2% |  | 261,673 | 89,070 | 81.4% |
| 240 months |  | 25,343 | 37,412 | 73.3% |  | 56,579 | 41,798 | 79.6% |  | 19,504 | 12,775 | 76.8% |  | 101,426 | 91,985 | 77.6% |
| 300 months |  | 8,656 | 37,532 | 71.3% |  | 17,174 | 42,199 | 76.1% |  | 6,945 | 12,908 | 74.3% |  | 32,775 | 92,639 | 74.8% |

Abbreviations: ER, estrogen receptor; PR, progesterone receptor.

*Cumulative number of events.

# **Table S3.** Detailed breast cancer specific survival rates according to hormone receptor subtype in each stage group

| Follow up time |  | ER(+)/PR(+) | | |  | ER(+)/PR(-) | | |  | ER(-)/PR(+) | | |  | ER(-)/PR(-) | | |  | ER/PR Unknown | | |  | Total | | |
| --- | --- | --- | --- | --- | --- | --- | --- | --- | --- | --- | --- | --- | --- | --- | --- | --- | --- | --- | --- | --- | --- | --- | --- | --- |
|  | Subject No | Event No* | Rate |  | Subject No | Event No* | Rate |  | Subject No | Event No* | Rate |  | Subject No | Event No* | Rate |  | Subject No | Event No* | Rate |  | Subject No | Event No* | Rate |
| Stage I |  |  |  |  |  |  |  |  |  |  |  |  |  |  |  |  |  |  |  |  |  |  |  |  |
| 60 months |  | 267,806 | 3,183 | 98.4% |  | 41,934 | 901 | 97.3% |  | 4,746 | 188 | 95.5% |  | 50,106 | 2,438 | 94.1% |  | 41,691 | 1,048 | 97.3% |  | 406,283 | 7,758 | 97.6% |
| 120 months |  | 163,398 | 6,621 | 95.7% |  | 27,471 | 1,678 | 93.8% |  | 3,573 | 305 | 92.0% |  | 32,943 | 3,533 | 90.3% |  | 35,092 | 2,105 | 94.0% |  | 262,477 | 14,242 | 94.5% |
| 180 months |  | 84,285 | 8,488 | 92.6% |  | 14,651 | 2,039 | 90.5% |  | 2,547 | 357 | 89.6% |  | 18,340 | 3,863 | 88.0% |  | 25,616 | 2,719 | 91.1% |  | 145,439 | 17,466 | 91.5% |
| 240 months |  | 31,745 | 9,177 | 89.2% |  | 5,278 | 2,144 | 87.5% |  | 1,465 | 389 | 87.0% |  | 7,455 | 3,989 | 85.6% |  | 12,321 | 2,969 | 88.3% |  | 58,264 | 18,668 | 88.5% |
| 300 months |  | 9,360 | 9,346 | 86.1% |  | 1,691 | 2,169 | 85.3% |  | 671 | 396 | 85.0% |  | 2,665 | 4,021 | 83.8% |  | 4,619 | 3,043 | 85.6% |  | 19,006 | 18,975 | 85.8% |
| Stage II |  |  |  |  |  |  |  |  |  |  |  |  |  |  |  |  |  |  |  |  |  |  |  |  |
| 60 months |  | 171,694 | 6,489 | 95.0% |  | 31,836 | 2,518 | 89.9% |  | 4,733 | 549 | 86.3% |  | 59,572 | 8,381 | 83.1% |  | 27,543 | 2,567 | 89.8% |  | 295,378 | 20,504 | 91.3% |
| 120 months |  | 99,786 | 12,246 | 87.8% |  | 18,088 | 3,948 | 80.8% |  | 2,935 | 741 | 79.9% |  | 33,530 | 10,183 | 77.6% |  | 20,599 | 4,001 | 82.8% |  | 174,938 | 31,119 | 84.3% |
| 180 months |  | 48,910 | 14,628 | 81.5% |  | 8,760 | 4,374 | 75.1% |  | 1,881 | 823 | 75.6% |  | 17,961 | 10,607 | 75.0% |  | 14,065 | 4,656 | 77.8% |  | 91,577 | 35,088 | 79.1% |
| 240 months |  | 17,211 | 15,315 | 76.1% |  | 2,869 | 4,473 | 70.9% |  | 1,004 | 854 | 72.3% |  | 6,896 | 10,719 | 73.1% |  | 6,264 | 4,854 | 73.8% |  | 34,244 | 36,215 | 74.9% |
| 300 months |  | 5,080 | 15,455 | 72.3% |  | 865 | 4,484 | 69.1% |  | 434 | 863 | 69.9% |  | 2,435 | 10,750 | 71.2% |  | 2,127 | 4,900 | 71.5% |  | 10,941 | 36,452 | 72.0% |
| Stage III |  |  |  |  |  |  |  |  |  |  |  |  |  |  |  |  |  |  |  |  |  |  |  |  |
| 60 months |  | 56,779 | 8,162 | 81.9% |  | 13,088 | 3,144 | 70.7% |  | 2,066 | 705 | 61.8% |  | 25,763 | 9,834 | 56.0% |  | 11,230 | 3,683 | 64.6% |  | 108,926 | 25,528 | 72.1% |
| 120 months |  | 30,272 | 13,114 | 64.9% |  | 6,101 | 4,303 | 54.2% |  | 991 | 872 | 49.9% |  | 10,039 | 11,020 | 48.2% |  | 6,073 | 4,878 | 50.5% |  | 53,476 | 34,187 | 57.8% |
| 180 months |  | 13,075 | 14,562 | 54.9% |  | 2,527 | 4,561 | 46.3% |  | 560 | 925 | 44.1% |  | 4,880 | 11,207 | 45.6% |  | 3,615 | 5,261 | 43.7% |  | 24,657 | 36,516 | 50.2% |
| 240 months |  | 4,499 | 14,928 | 47.8% |  | 790 | 4,606 | 42.1% |  | 280 | 944 | 40.2% |  | 1,817 | 11,266 | 43.2% |  | 1,532 | 5,358 | 39.6% |  | 8,918 | 37,102 | 45.1% |
| 300 months |  | 1,284 | 14,995 | 42.7% |  | 252 | 4,612 | 40.6% |  | 119 | 949 | 37.3% |  | 604 | 11,277 | 41.8% |  | 569 | 5,379 | 37.0% |  | 2,828 | 37,212 | 41.7% |

Abbreviations: ER, estrogen receptor; PR, progesterone receptor.

*Cumulative number of events.

# **Table S4.** Univariable and multivariable analyses for estrogen receptor and progesterone receptor

| Characteristics |  | Univariable Analysis | | | | | |  | Multivariable Analysis* | | | | | |
| --- | --- | --- | --- | --- | --- | --- | --- | --- | --- | --- | --- | --- | --- | --- |
|  | HR |  | CI (95%) | |  | *p* |  | HR |  | CI (95%) | |  | *p* |
| T category |  |  |  |  |  |  | <0.001 |  |  |  |  |  |  | <0.001 |
| T1 |  | Reference |  |  |  |  |  |  | Reference |  |  |  |  |  |
| T2 |  | 3.010 |  | 2.966 | 3.055 |  | <0.001 |  | 1.995 |  | 1.953 | 2.038 |  | <0.001 |
| T3 |  | 5.344 |  | 5.225 | 5.466 |  | <0.001 |  | 2.875 |  | 2.786 | 2.968 |  | <0.001 |
| T4 |  | 11.413 |  | 11.161 | 11.671 |  | <0.001 |  | 4.400 |  | 4.253 | 4.552 |  | <0.001 |
| N category |  |  |  |  |  |  | <0.001 |  |  |  |  |  |  | <0.001 |
| N0 |  | Reference |  |  |  |  |  |  | Reference |  |  |  |  |  |
| N1 |  | 2.474 |  | 2.435 | 2.514 |  | <0.001 |  | 1.931 |  | 1.889 | 1.974 |  | <0.001 |
| N2 |  | 5.288 |  | 5.190 | 5.388 |  | <0.001 |  | 3.351 |  | 3.260 | 3.444 |  | <0.001 |
| N3 |  | 9.484 |  | 9.295 | 9.676 |  | <0.001 |  | 5.265 |  | 5.110 | 5.425 |  | <0.001 |
| ER |  |  |  |  |  |  |  |  |  |  |  |  |  |  |
| Negative |  | Reference |  |  |  |  |  |  | Reference |  |  |  |  |  |
| Positive |  | 0.461 |  | 0.454 | 0.467 |  | <0.001 |  | 0.750 |  | 0.731 | 0.769 |  | <0.001 |
| PR |  |  |  |  |  |  |  |  |  |  |  |  |  |  |
| Negative |  | Reference |  |  |  |  |  |  | Reference |  |  |  |  |  |
| Positive |  | 0.489 |  | 0.483 | 0.496 |  | <0.001 |  | 0.728 |  | 0.711 | 0.746 |  | <0.001 |
| Histologic grade |  |  |  |  |  |  | <0.001 |  |  |  |  |  |  | <0.001 |
| Well differentiated |  | Reference |  |  |  |  |  |  | Reference |  |  |  |  |  |
| Moderately differentiated |  | 2.461 |  | 2.392 | 2.532 |  | <0.001 |  | 1.756 |  | 1.695 | 1.821 |  | <0.001 |
| Poorly differentiated |  | 5.209 |  | 5.067 | 5.353 |  | <0.001 |  | 2.576 |  | 2.484 | 2.673 |  | <0.001 |
| Undifferentiated |  | 5.068 |  | 4.834 | 5.315 |  | <0.001 |  | 2.525 |  | 2.361 | 2.699 |  | <0.001 |
| Race |  |  |  |  |  |  | <0.001 |  |  |  |  |  |  | <0.001 |
| Caucasian |  | Reference |  |  |  |  |  |  | Reference |  |  |  |  |  |
| African-American |  | 1.753 |  | 1.721 | 1.785 |  | <0.001 |  | 1.367 |  | 1.335 | 1.400 |  | <0.001 |
| Other races |  | 0.855 |  | 0.833 | 0.878 |  | <0.001 |  | 0.836 |  | 0.808 | 0.865 |  | <0.001 |
| Age group (years) |  |  |  |  |  |  | <0.001 |  |  |  |  |  |  | <0.001 |
| ≤50 |  | Reference |  |  |  |  |  |  | Reference |  |  |  |  |  |
| >50, ≤65 |  | 0.827 |  | 0.814 | 0.840 |  | <0.001 |  | 1.020 |  | 0.998 | 1.042 |  | 0.070 |
| >65 |  | 1.110 |  | 1.092 | 1.127 |  | <0.001 |  | 1.674 |  | 1.637 | 1.713 |  | <0.001 |
| Year of diagnosis |  |  |  |  |  |  | <0.001 |  |  |  |  |  |  | <0.001 |
| 1990-2000 |  | Reference |  |  |  |  |  |  | Reference |  |  |  |  |  |
| 2001-2009 |  | 0.744 |  | 0.734 | 0.755 |  | <0.001 |  | 0.853 |  | 0.834 | 0.873 |  | <0.001 |
| 2010-2015 |  | 0.587 |  | 0.572 | 0.602 |  | <0.001 |  | 0.755 |  | 0.732 | 0.780 |  | <0.001 |
| Operation |  |  |  |  |  |  |  |  |  |  |  |  |  |  |
| Breast conserving surgery |  | Reference |  |  |  |  |  |  | Reference |  |  |  |  |  |
| Mastectomy |  | 2.306 |  | 2.270 | 2.343 |  | <0.001 |  | 1.078 |  | 1.056 | 1.100 |  | <0.001 |
| Radiation therapy |  |  |  |  |  |  |  |  |  |  |  |  |  |  |
| No |  | Reference |  |  |  |  |  |  | Reference |  |  |  |  |  |
| Yes |  | 0.754 |  | 0.744 | 0.763 |  | <0.001 |  | 0.790 |  | 0.775 | 0.805 |  | <0.001 |
| Chemotherapy |  |  |  |  |  |  |  |  |  |  |  |  |  |  |
| No |  | Reference |  |  |  |  |  |  | Reference |  |  |  |  |  |
| Yes |  | 1.919 |  | 1.894 | 1.944 |  | <0.001 |  | 0.885 |  | 0.866 | 0.904 |  | <0.001 |

Abbreviations: CI, confidence interval, ER, estrogen receptor; HR, hazard ratio, PR, progesterone receptor.

*ER and PR was adjusted with 9 factors such as T category, N category, histologic grade, race, age group, year of diagnosis, operation, radiation therapy, and chemotherapy.

# **Fig. S1** Subject selection.

# **Fig. S2** Survival curves and subject proportions according to hormone receptor subtype in each race group. Breast cancer specific survival curves according to hormone receptor subtype in Caucasian (A), African-American (B), and other races (C). Subject proportions according to hormone receptor subtype in Caucasian (D), African-American (E), and other races (F).

Abbreviations: ER, estrogen receptor; PR, progesterone receptor.

# **Fig. S3** Survival curves and subject proportions according to hormone receptor subtype in each race group. Breast cancer specific survival curves according to hormone receptor subtype in age ≤ 50 years (A), 50 < age ≤ 65 years (B), and age > 65 years (C). Subject proportions according to hormone receptor subtype in age ≤ 50 years (D), 50 < age ≤ 65 years (E), and age > 65 years (F).

Abbreviations: ER, estrogen receptor; PR, progesterone receptor.

# **Fig. S4** Survival curves and subject proportions according to hormone receptor subtype in each race group. Breast cancer specific survival curves according to hormone receptor subtype in year of diagnosis ≤ 2000 (A), 2001 ≤ year of diagnosis ≤ 2009 (B), and year of diagnosis ≥ 2010 (C). Subject proportions according to hormone receptor subtype in year of diagnosis ≤ 2000 (D), 2001 ≤ year of diagnosis ≤ 2009 (E), and year of diagnosis ≥ 2010 (F).

Abbreviations: Dx, diagnosis; ER, estrogen receptor; PR, progesterone receptor.
